# Supplementary material for: SPAK inhibitor ZT‐1a attenuates reactive astrogliosis and oligodendrocyte degeneration in a mouse model of vascular dementia
Source: PubMed Central journal article supplement (PMC10909630; doi:10.1111/cns.14654), 2024-03-03

### Full gel blots of Fig. 3

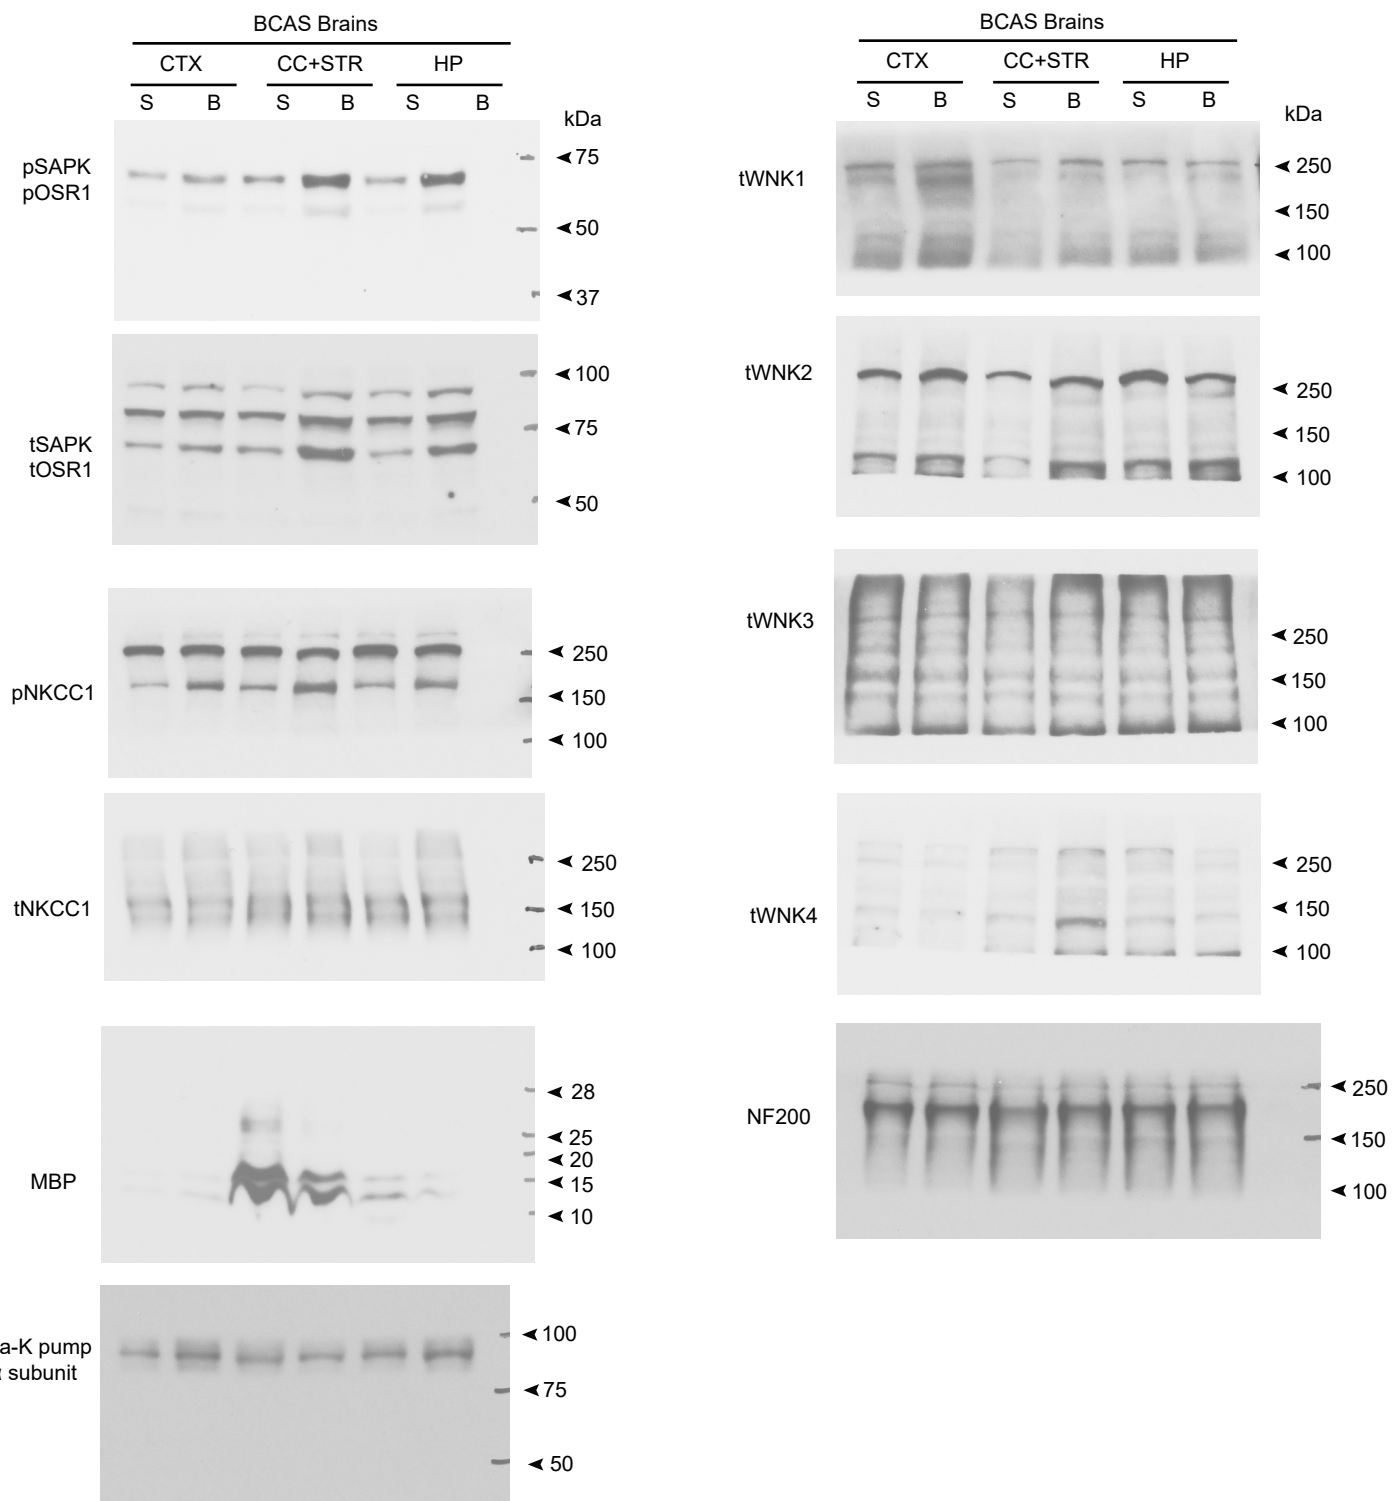

### Full gel blots of Fig. 6

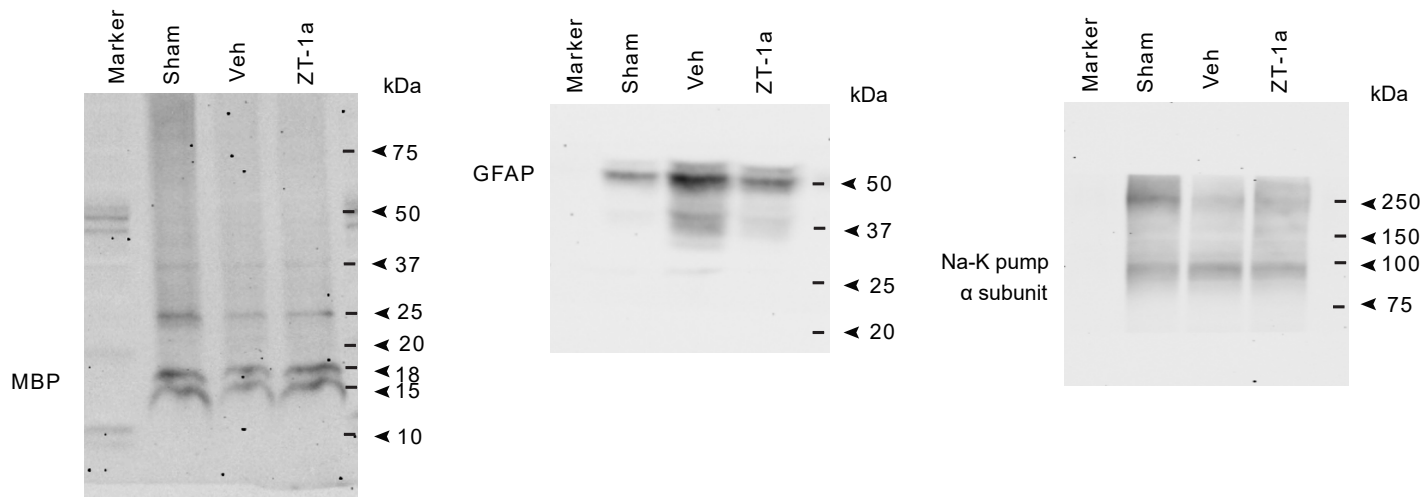

Supplement: CNS-30-e14654-s001.pdf [file CNS-30-e14654-s001.pdf]
